RESEARCH ARTICLE

# U-shape association of serum albumin level and acute kidney injury risk in hospitalized patients

Charat Thongprayoon<sup>1</sup>, Wisit Cheungpasitporn<sup>2</sup>, Michael A. Mao<sup>3</sup>, Ankit Sakhuja<sup>4</sup>, Kianoush Kashani<sup>3,4\*</sup>

**1** Department of Internal Medicine, Bassett Medical Center, Cooperstown, New York, United States of America, **2** Division of Nephrology, Department of Internal Medicine, University of Mississippi Medical Center, Jackson, Mississippi, United States of America, **3** Division of Nephrology and Hypertension, Department of Medicine, Mayo Clinic, Rochester, Minnesota, United States of America, **4** Division of Pulmonary and Critical Care Medicine, Department of Medicine, Mayo Clinic, Rochester, Minnesota, United States of America

\* [kashani.kianoush@mayo.edu](mailto:kashani.kianoush@mayo.edu)



## Abstract

### Background

While an association between hypoalbuminemia and increased risk of acute kidney injury (AKI) is well-established, the risk of AKI development and its severity among patients with elevated serum albumin is unclear. The aim of this study was to evaluate the risk of AKI in hospitalized patients stratified by various admission serum albumin levels.

### Methods

This single-center retrospective study was conducted at a tertiary referral hospital. All adult hospitalized patients who had admission albumin levels available between January 2009 and December 2013 were enrolled. Admission albumin was categorized based on its distribution into six groups ( $\leq 2.4$ , 2.5–2.9, 3.0–3.4, 3.5–3.9, 4.0–4.4, and  $\geq 4.5$  mg/dL). The primary outcome was the incidence of hospital-acquired AKI (HAKI). Logistic regression analysis was performed to obtain the odds ratio of AKI for various admission albumin strata using the albumin 3.5 to 3.9 mg/dL (lowest incidence of AKI) as the reference group.

### Results

Of the total 9,552 studied patients, HAKI occurred in 1,556 (16.3%) patients. The incidence of HAKI among patients with admission albumin  $\leq 2.4$ , 2.5–2.9, 3.0–3.4, 3.5–3.9, 4.0–4.4, and  $\geq 4.5$  mg/dL was 18.3%, 14.3%, 15.5%, 14.2%, 16.7%, and 26.0%, respectively. After adjusting for potential confounders, admission serum albumin levels  $\leq 2.4$  and  $\geq 4.5$  mg/dL were associated with an increased risk of HAKI with odds ratios of 1.52 (95% CI 1.18–1.94) and 2.16 (95% CI 1.74–2.69), respectively. While stage 1 HAKI was significantly more frequent among patients with admission albumin  $\geq 4.5$  mg/dL (23.0% vs. 11.6%,  $P < 0.001$ ), incidence of stage 3 HAKI was higher in those with albumin  $\leq 2.4$  mg/dL (2.8% vs 0.3%,  $P < 0.001$ ).

## OPEN ACCESS

**Citation:** Thongprayoon C, Cheungpasitporn W, Mao MA, Sakhuja A, Kashani K (2018) U-shape association of serum albumin level and acute kidney injury risk in hospitalized patients. PLoS ONE 13(6): e0199153. <https://doi.org/10.1371/journal.pone.0199153>

**Editor:** Ping-Hsun Wu, Kaohsiung Medical University Hospital, TAIWAN

**Received:** November 30, 2017

**Accepted:** June 3, 2018

**Published:** June 21, 2018

**Copyright:** © 2018 Thongprayoon et al. This is an open access article distributed under the terms of the [Creative Commons Attribution License](https://creativecommons.org/licenses/by/4.0/), which permits unrestricted use, distribution, and reproduction in any medium, provided the original author and source are credited.

**Data Availability Statement:** All relevant data are within the paper and its Supporting Information files.

**Funding:** The authors received no specific funding for this work.

**Competing interests:** The authors have declared that no competing interests exist.

## Conclusion

Admission serum albumin levels  $\leq 2.4$  and  $\geq 4.5$  mg/dL were associated with an increased risk for HAKI. Patients with admission albumin  $\geq 4.5$  mg/dL had HAKI with a lower intensity when compared with those who had admission albumin levels  $\leq 2.4$  mg/dL.

## Introduction

Acute kidney injury (AKI) is a substantial healthcare burden worldwide affecting almost 13.3 million patients per year [1, 2], associated with high morbidity and mortality, progression to chronic kidney disease (CKD), and significant healthcare costs [1–4]. AKI-related mortality has been reported to be as high as 23% or greater than 1.7 million deaths per year [1–3]. Previous studies have attempted to identify novel biomarkers of AKI, effective pharmacological interventions, and treatments to improve survival, lessen injury, or promote recovery [2, 4–10]. Most treatment strategies have been unfortunately unsuccessful [2, 7, 11]. Therefore, early identification and prevention of AKI among patients at-risk of AKI are critical.

Albumin is an important protein synthesized by the liver with multiple vital functions including osmotic pressure regulation, a carrier of poorly water-soluble molecules, antioxidant and anti-inflammatory effects [12–14]. Hypoalbuminemia is prevalent among hospitalized patients, with an incidence ranging from 16% up to 82% [12, 14–19]. Studies have shown associations of hypoalbuminemia with AKI and mortality in various clinical settings including general hospitalized patients, intensive care unit (ICU), coronary bypass surgery, emergency department, and liver transplantation [14, 15, 20–25]. Conversely, there are no studies that reported data on the incidence and effects of elevated serum albumin among patients admitted to the hospital. Thus, the objective of this study was to evaluate the risk of AKI in hospitalized patients stratified by various admission serum albumin levels.

## Materials and methods

### Study population

This is a single-center retrospective cohort study conducted at a tertiary referral hospital. All adult ( $\geq 18$  years old) hospitalized patients who had admission albumin available between January 2009 and December 2013 at Mayo Clinic, Rochester, MN, USA were enrolled in this study. Exclusion criteria were patients who did not provide research authorization, those without serum albumin measurement within 24 hours of admission, individuals with end-stage renal disease (ESRD) and patients who had AKI at hospital admission. For patients with multiple admissions during this period, only the first hospitalization was analyzed. ESRD and the need for initiation of renal replacement therapy following acute kidney injury were identified based on ICD-9 (International Classification of Diseases, 9th) code assignment (S1 Table). This study was reviewed and approved by the Mayo Clinic Institutional Review Board. Informed consent was waived due to its minimal risk nature.

### Data collection

The data collection was previously described in detail in a prior study [26]. Clinical characteristics, demographic information, and laboratory data were collected using automated retrieval from the institutional electronic medical record system. The admission serum albumin level was defined as the first serum albumin level within 24 hours of hospital admission. eGFR was

derived using the Chronic Kidney Disease Epidemiology Collaboration (CKD-EPI) equation [27]. CKD was defined as a calculated eGFR < 60 mL/min/1.73m<sup>2</sup>. The Charlson Comorbidity score [28] was computed for comorbidities at the time of admission. Principal diagnoses were grouped based on ICD-9 codes at admission (S2 Table).

### Clinical outcomes

The primary outcome was hospital-acquired AKI (HAKI), based on the KDIGO serum creatinine criterion [29]. HAKI was defined as an increase in serum creatinine of  $\geq 0.3$  mg/dL within 48 hours after admission date or  $\geq 1.5$  times baseline within 7 days after admission date. If outpatient baseline serum creatinine was not available, the Modification of Diet in Renal Disease equation [30] was used to estimate baseline serum creatinine level, assuming normal baseline GFR of 75 mL/min/1.73m<sup>2</sup>, in accordance with this guideline [29].

### Statistical analysis

Continuous variables are reported as mean  $\pm$  SD. All categorical variables are described as counts with percentages. Baseline demographics and clinical characteristics were compared among admission serum albumin groups, using ANOVA for continuous variables and the Chi-square test for categorical variables. We categorized admission serum albumin levels, based on its distribution at 10<sup>th</sup>, 25<sup>th</sup>, 50<sup>th</sup>, 75<sup>th</sup> and 90<sup>th</sup> percentiles, into six groups ( $\leq 2.4$ , 2.5–2.9, 3.0–3.4, 3.5–3.9, 4.0–4.4, and  $\geq 4.5$  mg/dL). Serum albumin level 3.5 to 3.9 mg/dL, given the lowest incidence of AKI, was selected as the reference group (Table 1). We performed univariate analysis and then multivariable logistic regression analysis to assess the independent association between various admission albumin levels and HAKI. Odds ratio (OR) with 95% confidence interval (CI) are reported. OR was adjusted for a priori defined variables. The adjusting variables were age, sex, race, baseline eGFR, principal diagnosis, Charlson comorbidity score, comorbidities, medications, the need for vasopressor and mechanical ventilator at hospital admission, and alcohol use. Comorbidities were coronary artery disease (CAD), hypertension (HTN), diabetes mellitus (DM), congestive heart failure (CHF), peripheral vascular disease (PVD), stroke, and cirrhosis. Medications were angiotensin-converting-enzyme inhibitors (ACEIs), angiotensin II receptor blockers (ARBs), nonsteroidal anti-inflammatory Drugs (NSAIDs) and diuretics. A two-tailed P value of <0.05 was considered statistically significant. All analyses were performed using JMP statistical software (version 10.0, SAS Institute, Cary, NC).

### Results

A total of 14,075 patients with available serum albumin measurement within 24 hours were identified. Among all screened patients, 968 individuals with ESRD, 3,551 patients with AKI at admission, and 4 patients without serum creatinine measurement during hospitalization were excluded. Finally, 9,552 unique patients were enrolled in the analysis (S1 Fig).

### Baseline characteristics

The baseline characteristics of the 9,552 patients with various serum albumin levels are summarized in Table 1. The distribution of serum albumin levels was as follows:  $\leq 2.4$  mg/dL, 672 patients (7.0%); 2.5–2.9 mg/dL, 1,231 patients (12.9%); 3.0–3.4 mg/dL, 2,147 patients (22.5%); 3.5–3.9 mg/dL, 2,654 patients (27.8%); 4.0–4.4 mg/dL, 2,086 patients (21.8%); and  $\geq 4.5$  mg/dL, 762 patients (8.0%). Of the 9,552 patients, 8,613 (90%) patients were whites and 5,028 (53%) were male. Mean ( $\pm$ SD) age was 60 $\pm$ 18 years. Patient comorbidities included HTN

**Table 1. Baseline clinical characteristics.**

| Variables                                        | All           | Serum albumin level at hospital admission (mg/dl) |               |               |             |              |              | p      |
|--------------------------------------------------|---------------|---------------------------------------------------|---------------|---------------|-------------|--------------|--------------|--------|
|                                                  |               | ≤2.4                                              | 2.5–2.9       | 3.0–3.4       | 3.5–3.9     | 4.0–4.4      | ≥4.5         |        |
| N                                                | 9552          | 672                                               | 1231          | 2147          | 2654        | 2086         | 762          |        |
| Age (year)                                       | 60±18         | 59±16                                             | 61±17         | 63±18         | 62±18       | 57±18        | 49±17        | <0.001 |
| Male                                             | 5028 (53)     | 351 (52)                                          | 652 (53)      | 1148 (53)     | 1400 (53)   | 1080 (52)    | 397 (52)     | 0.92   |
| White                                            | 8613 (90)     | 597 (89)                                          | 1106 (90)     | 1943 (90)     | 2393 (90)   | 1891 (91)    | 683 (90)     | 0.77   |
| Charlson Comorbidity Score                       | 2.1±2.6       | 2.0±2.5                                           | 2.6±3.0       | 2.5±2.8       | 2.2±2.7     | 1.8±2.4      | 1.1±1.8      | <0.001 |
| GFR (ml/min/1.73m2)                              | 87±25         | 93±25                                             | 90±16         | 86±25         | 85±25       | 86±24        | 92±22        | <0.001 |
| Comorbidities                                    |               |                                                   |               |               |             |              |              |        |
| - Coronary artery disease                        | 1576 (16)     | 78 (12)                                           | 192 (16)      | 377 (18)      | 519 (20)    | 351 (17)     | 59 (8)       | <0.001 |
| - Hypertension                                   | 4154 (43)     | 261 (39)                                          | 507 (41)      | 1017 (47)     | 1284 (48)   | 885 (42)     | 200 (26)     | <0.001 |
| - Diabetes mellitus                              | 1752 (18)     | 110 (16)                                          | 253 (21)      | 415 (19)      | 552 (21)    | 357 (17)     | 65 (9)       | <0.001 |
| - Congestive heart failure                       | 677 (7)       | 28 (4)                                            | 86 (7)        | 155 (7)       | 225 (8)     | 151 (7)      | 32 (4)       | <0.001 |
| - Peripheral vascular disease                    | 238 (2)       | 11 (2)                                            | 46 (4)        | 61 (3)        | 65 (2)      | 45 (2)       | 10 (1)       | <0.001 |
| - Stroke                                         | 651 (7)       | 24 (4)                                            | 87 (7)        | 143 (7)       | 238 (9)     | 132 (6)      | 27 (4)       | <0.001 |
| - Cirrhosis                                      | 624 (7)       | 95 (14)                                           | 155 (13)      | 175 (8)       | 122 (5)     | 61 (3)       | 16 (2)       | <0.001 |
| Principal diagnosis                              |               |                                                   |               |               |             |              |              | <0.001 |
| - Cardiovascular                                 | 1579 (17)     | 32 (5)                                            | 133 (11)      | 286 (13)      | 560 (21)    | 447 (21)     | 121 (16)     |        |
| - Hematology/Oncology                            | 1708 (18)     | 108 (16)                                          | 203 (16)      | 403 (19)      | 447 (17)    | 399 (19)     | 148 (19)     |        |
| - Infectious disease                             | 442 (5)       | 85 (13)                                           | 104 (8)       | 124 (6)       | 93 (4)      | 28 (1)       | 8 (1)        |        |
| - Endocrine/Metabolic                            | 445 (5)       | 28 (4)                                            | 65 (5)        | 105 (5)       | 124 (5)     | 102 (5)      | 21 (3)       |        |
| - Respiratory                                    | 561 (6)       | 40 (6)                                            | 92 (7)        | 164 (8)       | 154 (6)     | 93 (4)       | 18 (2)       |        |
| - Gastrointestinal/Hepatology                    | 1699 (18)     | 203 (30)                                          | 313 (25)      | 436 (20)      | 436 (16)    | 233 (11)     | 78 (10)      |        |
| - Injury/Poisoning                               | 1569 (16)     | 84 (13)                                           | 149 (12)      | 312 (15)      | 360 (14)    | 419 (20)     | 245 (32)     |        |
| - Other                                          | 1549 (16)     | 92 (14)                                           | 172 (14)      | 317 (15)      | 480 (18)    | 365 (17)     | 123 (16)     |        |
| Urgency of admission                             |               |                                                   |               |               |             |              |              | <0.001 |
| - Emergent                                       | 4267 (45)     | 286 (43)                                          | 551 (45)      | 1074 (50)     | 1326 (50)   | 823 (40)     | 207 (27)     |        |
| - Urgent                                         | 2468 (26)     | 241 (36)                                          | 373 (30)      | 567 (26)      | 678 (26)    | 466 (22)     | 143 (19)     |        |
| - Elective                                       | 2817 (29)     | 145 (20)                                          | 307 (25)      | 506 (24)      | 650 (24)    | 797 (38)     | 412 (54)     |        |
| Surgical procedures requiring general anesthesia | 3397 (36)     | 240 (36)                                          | 404 (33)      | 702 (33)      | 791 (30)    | 833 (40)     | 427 (56)     | <0.001 |
| Medication                                       |               |                                                   |               |               |             |              |              |        |
| - ACEI/ARB                                       | 2878 (30)     | 148 (22)                                          | 305 (25)      | 664 (31)      | 896 (34)    | 676 (32)     | 189 (25)     | <0.001 |
| - Diuretics                                      | 3443 (36)     | 287 (43)                                          | 510 (41)      | 812 (38)      | 958 (36)    | 701 (34)     | 175 (23)     | <0.001 |
| - NSAID                                          | 1633 (17)     | 99 (15)                                           | 169 (14)      | 352 (16)      | 448 (17)    | 395 (19)     | 170 (22)     | <0.001 |
| Received contrast media                          | 2970 (31)     | 306 (46)                                          | 490 (40)      | 775 (36)      | 821 (31)    | 456 (22)     | 122 (16)     | <0.001 |
| Received IV Fluid Bolus                          | 1000 (10)     | 165 (25)                                          | 167 (14)      | 236 (11)      | 214 (8)     | 159 (8)      | 59 (8)       | <0.001 |
| Vasopressor use                                  | 459 (5)       | 58 (9)                                            | 72 (6)        | 108 (5)       | 97 (4)      | 76 (4)       | 49 (6)       | <0.001 |
| Mechanical ventilator                            | 945 (10)      | 110 (16)                                          | 142 (12)      | 235 (11)      | 202 (8)     | 180 (9)      | 76 (10)      | <0.001 |
| Alcohol use                                      | 926 (10)      | 103 (15)                                          | 118 (10)      | 209 (10)      | 249 (9)     | 197 (9)      | 50 (7)       | <0.001 |
| Urine Protein (mg/dL), Median (IQR)              | 213 (106–463) | 321 (157–668)                                     | 303 (148–617) | 243 (131–509) | 180–93–364) | 139 (78–355) | 127 (72–236) | <0.001 |

Continuous data are presented as mean ± SD; categorical data are presented as count (percentage)

<https://doi.org/10.1371/journal.pone.0199153.t001>

(43%), DM (18%), CAD (16%), and CHF (7%). Prior to admission, 36% of the patients were taking diuretics, 30% were on ACEIs or ARBs, and 17% were receiving NSAIDs.

Analysis of the principle admission diagnosis showed that patients with a diagnosis of gastrointestinal tract/liver-related problems presented with low admission serum albumin levels,



**Fig 1. Hospital acquired acute kidney injury (HAKI) incidence with various admission serum albumin levels.**

<https://doi.org/10.1371/journal.pone.0199153.g001>

while patients with trauma/injury and poisoning diagnoses presented with high admission serum albumin levels (Table 1).

### Admission serum albumin levels and risk of acute kidney injury

The incidence of HAKI was 18.3%, 14.3%, 15.5%, 14.2%, 16.7%, and 26.0% in patients with admission albumin ≤2.4, 2.5–2.9, 3.0–3.4, 3.5–3.9, 4.0–4.4, and ≥4.5 mg/dL, respectively (Fig 1, Table 2). Severity and HAKI staging and the incidence of renal replacement therapy initiation after HAKI among patients with various admission serum albumin levels are

**Table 2. Hospital acquired acute kidney injury (HAKI) and mortality among patients with various admission serum albumin levels.**

| Outcome                            | All (N = 9552) | Serum albumin level at hospital admission (mg/dl) |                    |                    |                    |                    |                | P      |
|------------------------------------|----------------|---------------------------------------------------|--------------------|--------------------|--------------------|--------------------|----------------|--------|
|                                    |                | ≤2.4 (N = 672)                                    | 2.5-2.9 (N = 1231) | 3.0-3.4 (N = 2147) | 3.5-3.9 (N = 2654) | 4.0-4.4 (N = 2086) | ≥4.5 (N = 762) |        |
| HAKI                               | 1556 (16.3)    | 123 (18.3)                                        | 176 (14.3)         | 333 (15.5)         | 378 (14.2)         | 348 (16.7)         | 198 (26.0)     | <0.001 |
| HAKI stage                         |                |                                                   |                    |                    |                    |                    |                | <0.001 |
| - Stage 1                          | 1275 (13.3)    | 78 (11.6)                                         | 136 (11.0)         | 261 (12.2)         | 319 (12)           | 306 (14.7)         | 175 (23.0)     |        |
| - Stage 2                          | 188 (2.0)      | 26 (3.9)                                          | 18 (1.5)           | 44 (2.0)           | 45 (1.7)           | 34 (1.6)           | 21 (2.8)       |        |
| - Stage 3                          | 93 (1.0)       | 19 (2.8)                                          | 22 (1.8)           | 28 (1.3)           | 14 (0.5)           | 8 (0.4)            | 2 (0.3)        |        |
| Need for renal replacement therapy | 119 (1.3)      | 23 (3.4)                                          | 24 (2.0)           | 27 (1.3)           | 30 (1.1)           | 10 (0.5)           | 5 (0.7)        | <0.001 |
| In-hospital mortality              | 247 (2.6)      | 52 (7.7)                                          | 43 (3.5)           | 66 (3.1)           | 63 (2.4)           | 17 (0.8)           | 6 (0.8)        | <0.001 |

<https://doi.org/10.1371/journal.pone.0199153.t002>

shown in Table 2. While the incidence of stage 1 HAKI among admission albumin  $\geq 4.5$  mg/dL group was significantly higher than the incidence among admission serum albumin  $\leq 2.4$  mg/dL group (23.0% vs. 11.6%,  $P < 0.001$ ), the incidence of stage 3 HAKI in admission serum albumin  $\leq 2.4$  mg/dL group was significantly higher than the incidence in admission serum albumin  $\geq 4.5$  mg/dL group (2.8% vs. 0.3%,  $P < 0.001$ ). This, in turn, translated to higher need for renal replacement therapy rate among patients with serum albumin  $\leq 2.4$  mg/dL when compared with patients with admission serum albumin of  $\geq 4.5$  mg/dL (3.4% vs. 0.7%,  $P < 0.001$ ).

Among 9,552 patients, 247 (2.6%) died in the hospital. The lowest in-hospital mortality (0.8%) was observed in patients with admission serum albumin of  $\geq 4.0$  mg/dL (Table 2). The in-hospital mortality progressively increased with lower levels of admission serum albumin. The highest crude in-hospital mortality was observed in patients with admission serum albumin  $\leq 2.4$  mg/dL.

To assess whether admission serum albumin levels were independently associated with HAKI development, logistic regression models were built, using 3.5–3.9 mg/dL (lowest incidence of HAKI) as a reference range. In unadjusted analysis, an admission albumin  $\leq 2.4$  mg/dL, 4.0–4.4 mg/dL, and  $\geq 4.5$  mg/dL were associated with an increased risk of HAKI with odds ratios of 1.35 (95% CI 1.07–1.68), 1.21 (95% CI 1.03–1.41), and 2.11 (95% CI 1.74–2.57), respectively. When adjusted for potential confounders, admission albumin  $\leq 2.4$  mg/dL and  $\geq 4.5$  mg/dL were associated with an increased risk of HAKI with odds ratios of 1.52 (95% CI 1.18–1.94) and 2.16 (95% CI 1.74–2.69), respectively (Table 3). Admission serum albumin levels between 2.5 and 4.4 mg/dL were not predictive for the development of HAKI during hospitalization.

### Subgroup analysis based on cirrhosis and chronic kidney disease

Of the 9,552 patients, 624 patients had cirrhosis. After adjusting for potential confounders, admission serum albumin  $\leq 2.4$  mg/dL were associated with an increased risk of HAKI in patients with cirrhosis with adjusted OR of 2.60 (95% CI 1.32–5.21) (Table 4). In analyses of 8,928 non-cirrhotic patients, admission serum albumin  $\leq 2.4$  and  $\geq 4.5$  mg/dL were associated with an increased risk of HAKI with adjusted odds ratios of 1.34 (95% CI 1.01–1.76) and 2.19 (95% CI 1.75–2.74), respectively (Table 4).

Within the main cohort, 959 patients had chronic kidney disease. In this subgroup, there was no significant association between admission serum albumin and HAKI (Table 5).

**Table 3. Odds ratios for the association between admission serum albumin levels and hospital acquired acute kidney injury (HAKI) occurrence.**

| Serum albumin level at hospital admission (mg/dl) | Univariate analysis |           | Multivariate analysis |           |
|---------------------------------------------------|---------------------|-----------|-----------------------|-----------|
|                                                   | OR (95% CI)         | p         | Adjusted OR (95% CI)  | p         |
| $\leq 2.4$                                        | 1.35 (1.07–1.68)    | 0.01      | 1.52 (1.18–1.94)      | 0.001     |
| 2.5–2.9                                           | 1.004 (0.83–1.22)   | 0.96      | 1.05 (0.85–1.29)      | 0.65      |
| 3.0–3.4                                           | 1.11 (0.94–1.30)    | 0.21      | 1.10 (0.93–1.31)      | 0.27      |
| 3.5–3.9                                           | 1 (ref)             |           | 1 (ref)               |           |
| 4.0–4.4                                           | 1.21 (1.03–1.41)    | 0.02      | 1.18 (0.99–1.39)      | 0.06      |
| $\geq 4.5$                                        | 2.11 (1.74–2.57)    | $< 0.001$ | 2.16 (1.74–2.69)      | $< 0.001$ |

Adjusted for age, sex, race, Charlson Comorbidity score, baseline GFR, history of coronary artery disease, hypertension, diabetes mellitus, congestive heart failure, peripheral vascular disease, stroke, cirrhosis, principal diagnosis, use of ACEI/ARB, NSAID, diuretics, the need for vasopressor and mechanical ventilator at hospital admission, alcohol use

<https://doi.org/10.1371/journal.pone.0199153.t003>

**Table 4. Odds ratios for the association between admission serum albumin levels and hospital acquired acute kidney injury (HAKI) occurrence in subgroups of patients with and without cirrhosis.**

| Serum albumin level at hospital admission (mg/dl) | Univariate analysis |        | Multivariate analysis |        |
|---------------------------------------------------|---------------------|--------|-----------------------|--------|
|                                                   | OR (95% CI)         | p      | Adjusted OR (95% CI)  | p      |
| <b>Cirrhosis (n = 624)</b>                        |                     |        |                       |        |
| ≤2.4                                              | 1.87 (1.04–3.37)    | 0.03   | 2.60 (1.32–5.21)      | 0.006  |
| 2.5–2.9                                           | 0.83 (0.47–1.46)    | 0.52   | 1.07 (0.56–2.02)      | 0.84   |
| 3.0–3.4                                           | 1.16 (0.69–1.98)    | 0.58   | 1.07 (0.59–1.97)      | 0.82   |
| 3.5–3.9                                           | 1 (ref)             |        | 1 (ref)               |        |
| 4.0–4.4                                           | 0.60 (0.26–1.29)    | 0.20   | 0.79 (0.32–1.87)      | 0.60   |
| ≥4.5                                              | 0.44 (0.07–1.69)    | 0.25   | 0.53 (0.07–2.32)      | 0.42   |
| <b>Without cirrhosis (n = 8928)</b>               |                     |        |                       |        |
| ≤2.4                                              | 1.11 (0.86–1.43)    | 0.41   | 1.34 (1.01–1.76)      | 0.04   |
| 2.5–2.9                                           | 0.96 (0.78–1.18)    | 0.72   | 1.05 (0.83–1.31)      | 0.68   |
| 3.0–3.4                                           | 1.06 (0.90–1.26)    | 0.50   | 1.09 (0.91–1.31)      | 0.34   |
| 3.5–3.9                                           | 1 (ref)             |        | 1 (ref)               |        |
| 4.0–4.4                                           | 1.26 (1.07–1.48)    | 0.006  | 1.19 (0.99–1.41)      | 0.06   |
| ≥4.5                                              | 2.24 (1.83–2.73)    | <0.001 | 2.19 (1.75–2.74)      | <0.001 |

Adjusted for age, sex, race, Charlson Comorbidity score, baseline GFR, history of coronary artery disease, hypertension, diabetes mellitus, congestive heart failure, peripheral vascular disease, stroke, principal diagnosis, use of ACEI/ARB, NSAID, diuretics, the need for vasopressor and mechanical ventilator at hospital admission, alcohol use

<https://doi.org/10.1371/journal.pone.0199153.t004>

## Discussion

In this large retrospective cohort study, we demonstrated that admission serum albumin levels ≤2.4 and ≥4.5 mg/dL were associated with an increased risk for HAKI. Admission serum albumin levels ≥4.5 mg/dL were associated with the highest risk (2.16-fold) of HAKI. However, compared with serum albumin levels ≤2.4 mg/dL, the severity of HAKI among patients with serum albumin ≥4.5 mg/dL was significantly lower. Among patients with cirrhosis, only admission serum albumin level ≤2.4 mg/dL was associated with risk of HAKI (2.60-fold).

Several factors can influence hypoalbuminemia including inflammation and/or infections, malnutrition and/or protein-losing disorders, oxidative stress, cancer cachexia, and liver

**Table 5. Odds ratios for the association between admission serum albumin levels and hospital acquired acute kidney injury (HAKI) occurrence in subgroups of patients with chronic kidney disease (n = 959).**

| Serum albumin level at hospital admission (mg/dl) | Univariate analysis |      | Multivariate analysis |      |
|---------------------------------------------------|---------------------|------|-----------------------|------|
|                                                   | OR (95% CI)         | p    | Adjusted OR (95% CI)  | p    |
| ≤2.4                                              | 2.06 (0.97–4.23)    | 0.06 | 2.17 (0.93–4.88)      | 0.07 |
| 2.5–2.9                                           | 1.00 (0.57–1.71)    | 0.99 | 1.08 (0.59–1.93)      | 0.79 |
| 3.0–3.4                                           | 1.23 (0.84–1.81)    | 0.29 | 1.21 (0.80–1.83)      | 0.37 |
| 3.5–3.9                                           | 1 (ref)             |      | 1 (ref)               |      |
| 4.0–4.4                                           | 1.06 (0.70–1.59)    | 0.78 | 1.12 (0.72–1.74)      | 0.61 |
| ≥4.5                                              | 0.77 (0.32–1.66)    | 0.52 | 0.84 (0.33–1.92)      | 0.69 |

Adjusted for age, sex, race, Charlson Comorbidity score, baseline GFR, history of coronary artery disease, hypertension, diabetes mellitus, congestive heart failure, peripheral vascular disease, stroke, cirrhosis, principal diagnosis, use of ACEI/ARB, NSAID, diuretics, the need for vasopressor and mechanical ventilator at hospital admission, alcohol use

<https://doi.org/10.1371/journal.pone.0199153.t005>

dysfunction [31–37]. Thus, hypoalbuminemia may indicate the severity of an underlying disease and/or a marker of malnutrition [13, 38]. In addition, studies have also consistently demonstrated that hypoalbuminemia is independently associated with increased risks of AKI development and mortality in critically ill, among various surgical and other settings [14, 15, 20–25]. In addition to the albumin role in maintenance of plasma volume by preserving colloid osmotic pressure, it also provides many physiological effects, including coupling and carrying various endogenous and exogenous toxic substances, scavenging free radicals, maintaining capillary membrane permeability, providing a physiological reservoir of nitric oxide, imparting an anti-inflammatory effect, and finally inhibition of apoptosis [15, 38, 39]. Several studies have suggested that serum albumin can preserve the kidneys from toxic agents and maintain optimal oncotic pressure and kidney perfusion [40–45]. In multivariate analysis adjusted for potential confounders, we confirmed an association between admission hypoalbuminemia and an increased risk of AKI among general hospitalized patients.

Our study is the first to demonstrate an association between elevated admission serum albumin  $\geq 4.5$  mg/dL and an increased risk of HAKI. Elevated serum albumin levels have been described in patients with dehydration and high protein diet consumption [46–48]. Although high-protein diets can increase albumin synthesis [49], albumin only increases by small increments, and high serum albumin levels  $\geq 4.5$  mg/dL are mostly caused by volume depletion [46–48]. Thus, intravascular volume depletion likely explains the association between elevated admission serum albumin and an increased risk of HAKI in our study. This likely explains why the HAKI severity in the setting of elevated serum albumin  $\geq 4.5$  mg/dL is lower, compared with HAKI occurring in patients with serum albumin levels  $\leq 2.4$  mg/dL who may have more severe underlying illness. The findings from our study demonstrated that hospital mortality did not reflect the U-shaped association as seen with AKI incidence. On the contrary, death was lowest for those with serum albumin levels  $\geq 4$  mg/dL. Additionally, these findings support our assumption that increased rates of lower stages of AKI among patients with serum albumin levels  $\geq 4.5$  mg/dL are mostly due to volume depletion and of minor clinical relevance.

Although there is potential evidence that use of intravenous albumin may reduce the risk of AKI in particular patient population, such as off-pump coronary artery bypass surgery (CABG) patients [50], it is unclear if normalization of admission serum albumin can reduce the risk of in-hospital AKI among general hospitalized patients. In a meta-analysis of 17 randomized controlled trials assessing the effect of albumin as a resuscitation fluid for patients with sepsis [51], the use of albumin-containing solutions was associated with lower mortality compared with other fluid resuscitation regimens. Lee et al. [50] recently conducted a trial assessing effect of exogenous albumin on the incidence of postoperative AKI in patients undergoing off-pump CABG with a preoperative albumin level  $< 4.0$  g/dL and demonstrated that 20% exogenous albumin administration immediately before the operation increased urine output during surgery and decreased the risk of postoperative AKI [50]. A recent retrospective cohort study by Yu et al. suggested that replacement of albumin after the development of AKI may also promote renal recovery [14]. In a meta-analysis of eleven randomized clinical trials evaluating the effect of hyperoncotic colloids on AKI in a wide variety of clinical scenarios including ascites, surgery, sepsis and spontaneous bacterial peritonitis, Wiedermann et al. demonstrated that administration of hyperoncotic albumin solutions could decrease the odds of AKI by 76% [52]. Thus, future prospective trials assessing the potentially beneficial effect of intravenous albumin administration on the risk of AKI among general hospitalized patients are warranted.

There are some limitations that bear mentioning. First, this is a single-center, historical cohort study. The patient population in our cohort is comparatively homogeneous consisting

of predominantly whites. Future studies with a more diversified population and more comprehensive clinical information are needed to better assess the effects of admission serum albumin levels on HAKI. Second, the number of patients with the diagnosis of cirrhosis was small ( $N = 624$ ). The failure to observe any association between elevated admission serum albumin levels  $\geq 4.5$  mg/dL and HAKI in patients with cirrhosis could be due to small sample size (Type II error). Lastly, based on the retrospective nature of this design a causal relationship could not be inferred.

In summary, this study demonstrates that admission serum albumin levels  $\leq 2.4$  and  $\geq 4.5$  mg/dL are associated with an increased risk for in-hospital AKI. However, AKI in patients with admission serum albumin  $\geq 4.5$  mg/dL is less severe and has a lower association with higher mortality rates, compared to those with serum albumin levels  $\leq 2.4$  mg/dL.

## Supporting information

**S1 Table. ICD-9 for end-stage renal disease.**

(DOCX)

**S2 Table. ICD-9 for principal diagnosis.**

(DOCX)

**S1 Fig. Study flow.**

(DOCX)

**S1 Dataset. Dataset.**

(JMP)

## Author Contributions

**Conceptualization:** Charat Thongprayoon, Wisit Cheungpasitporn, Kianoush Kashani.

**Data curation:** Charat Thongprayoon.

**Formal analysis:** Charat Thongprayoon.

**Investigation:** Charat Thongprayoon, Wisit Cheungpasitporn, Michael A. Mao, Ankit Sakhuja.

**Methodology:** Charat Thongprayoon, Wisit Cheungpasitporn, Kianoush Kashani.

**Project administration:** Kianoush Kashani.

**Resources:** Kianoush Kashani.

**Supervision:** Kianoush Kashani.

**Validation:** Charat Thongprayoon, Wisit Cheungpasitporn, Ankit Sakhuja.

**Visualization:** Charat Thongprayoon.

**Writing – original draft:** Charat Thongprayoon, Wisit Cheungpasitporn.

**Writing – review & editing:** Michael A. Mao, Ankit Sakhuja, Kianoush Kashani.

## References

1. Mehta RL, Cerda J, Burdmann EA, Tonelli M, Garcia-Garcia G, Jha V, et al. International Society of Nephrology's Oby25 initiative for acute kidney injury (zero preventable deaths by 2025): a human rights case for nephrology. *Lancet*. 2015; 385(9987):2616–43. [https://doi.org/10.1016/S0140-6736\(15\)60126-X](https://doi.org/10.1016/S0140-6736(15)60126-X) PMID: 25777661.

2. Zuk A, Bonventre JV. Acute Kidney Injury. Annual review of medicine. 2016; 67:293–307. Epub 2016/01/16. <https://doi.org/10.1146/annurev-med-050214-013407> PMID: 26768243.
3. Thongprayoon C, Cheungpasitporn W, Akhoundi A, Ahmed AH, Kashani KB. Actual versus ideal body weight for acute kidney injury diagnosis and classification in critically ill patients. BMC Nephrol. 2014; 15(1):176. Epub 2014/11/16. <https://doi.org/10.1186/1471-2369-15-176> PMID: 25398596.
4. Kashani K, Cheungpasitporn W, Ronco C. Biomarkers of acute kidney injury: the pathway from discovery to clinical adoption. Clinical chemistry and laboratory medicine. 2017; 55(8):1074–89. Epub 2017/01/12. <https://doi.org/10.1515/cclm-2016-0973> PMID: 28076311.
5. Cheng X, Tong J, Hu Q, Chen S, Yin Y, Liu Z. Meta-analysis of the effects of preoperative renin-angiotensin system inhibitor therapy on major adverse cardiac events in patients undergoing cardiac surgery. Eur J Cardiothorac Surg. 2014. Epub 2014/10/11. <https://doi.org/10.1093/ejcts/ezu330> PMID: 25301954.
6. Yacoub R, Patel N, Lohr JW, Rajagopalan S, Nader N, Arora P. Acute kidney injury and death associated with renin angiotensin system blockade in cardiothoracic surgery: a meta-analysis of observational studies. Am J Kidney Dis. 2013; 62(6):1077–86. Epub 2013/06/25. <https://doi.org/10.1053/j.ajkd.2013.04.018> PMID: 23791246.
7. Garg AX, Kurz A, Sessler DI, Cuerden M, Robinson A, Mrkobrada M, et al. Perioperative Aspirin and Clonidine and Risk of Acute Kidney Injury: A Randomized Clinical Trial. JAMA. 2014. Epub 2014/11/16. <https://doi.org/10.1001/jama.2014.15284> PMID: 25399007.
8. Parikh CR, Moledina DG, Coca SG, Thiessen-Philbrook HR, Garg AX. Application of new acute kidney injury biomarkers in human randomized controlled trials. Kidney international. 2016; 89(6):1372–9. Epub 2016/05/12. <https://doi.org/10.1016/j.kint.2016.02.027> PMID: 27165835.
9. Kashani K, Cheungpasitporn W, Ronco C. Biomarkers of acute kidney injury: the pathway from discovery to clinical adoption. Clin Chem Lab Med. 2017. <https://doi.org/10.1515/cclm-2016-0973> PMID: 28076311.
10. Thongprayoon C, Cheungpasitporn W, Gillaspie EA, Greason KL, Kashani KB. The risk of acute kidney injury following transapical versus transfemoral transcatheter aortic valve replacement: a systematic review and meta-analysis. Clin Kidney J. 2016; 9(4):560–6. <https://doi.org/10.1093/ckj/sfw055> PMID: 27478597.
11. Wilson FP, Shashaty M, Testani J, Aqeel I, Borovskiy Y, Ellenberg SS, et al. Automated, electronic alerts for acute kidney injury: a single-blind, parallel-group, randomised controlled trial. Lancet. 2015; 385(9981):1966–74. Epub 2015/03/03. [https://doi.org/10.1016/S0140-6736\(15\)60266-5](https://doi.org/10.1016/S0140-6736(15)60266-5) PMID: 25726515.
12. Namendys-Silva SA, Gonzalez-Herrera MO, Texcocano-Becerra J, Herrera-Gomez A. Hypoalbuminemia in critically ill patients with cancer: incidence and mortality. The American journal of hospice & palliative care. 2011; 28(4):253–7. Epub 2010/11/09. <https://doi.org/10.1177/1049909110384841> PMID: 21057142.
13. Vincent JL. Relevance of albumin in modern critical care medicine. Best practice & research Clinical anaesthesiology. 2009; 23(2):183–91. Epub 2009/08/06. PMID: 19653438.
14. Yu MY, Lee SW, Baek SH, Na KY, Chae DW, Chin HJ, et al. Hypoalbuminemia at admission predicts the development of acute kidney injury in hospitalized patients: A retrospective cohort study. PLoS one. 2017; 12(7):e0180750. Epub 2017/07/21. <https://doi.org/10.1371/journal.pone.0180750> PMID: 28723973.
15. Wiedermann CJ, Wiedermann W, Joannidis M. Hypoalbuminemia and acute kidney injury: a meta-analysis of observational clinical studies. Intensive Care Med. 2010; 36(10):1657–65. <https://doi.org/10.1007/s00134-010-1928-z> PMID: 20517593.
16. Sung J, Bochicchio GV, Joshi M, Bochicchio K, Costas A, Tracy K, et al. Admission serum albumin is predictive of outcome in critically ill trauma patients. The American surgeon. 2004; 70(12):1099–102. Epub 2005/01/25. PMID: 15663053.
17. Fleck A, Raines G, Hawker F, Trotter J, Wallace PI, Ledingham IM, et al. Increased vascular permeability: a major cause of hypoalbuminaemia in disease and injury. Lancet. 1985; 1(8432):781–4. Epub 1985/04/06. PMID: 2858667.
18. Blunt MC, Nicholson JP, Park GR. Serum albumin and colloid osmotic pressure in survivors and non-survivors of prolonged critical illness. Anaesthesia. 1998; 53(8):755–61. Epub 1998/11/03. PMID: 9797519.
19. Reinhardt GF, Myscofski JW, Wilkens DB, Dobrin PB, Mangan JE Jr., Stannard RT. Incidence and mortality of hypoalbuminemic patients in hospitalized veterans. JPEN Journal of parenteral and enteral nutrition. 1980; 4(4):357–9. Epub 1980/07/01. <https://doi.org/10.1177/014860718000400404> PMID: 6774116.

20. Sang BH, Bang JY, Song JG, Hwang GS. Hypoalbuminemia Within Two Postoperative Days Is an Independent Risk Factor for Acute Kidney Injury Following Living Donor Liver Transplantation: A Propensity Score Analysis of 998 Consecutive Patients. *Critical care medicine*. 2015; 43(12):2552–61. Epub 2015/08/27. <https://doi.org/10.1097/CCM.0000000000001279> PMID: 26308436.
21. Liu M, Chan CP, Yan BP, Zhang Q, Lam YY, Li RJ, et al. Albumin levels predict survival in patients with heart failure and preserved ejection fraction. *European journal of heart failure*. 2012; 14(1):39–44. Epub 2011/12/14. <https://doi.org/10.1093/eurjhf/hfr154> PMID: 22158777.
22. Lee EH, Baek SH, Chin JH, Choi DK, Son HJ, Kim WJ, et al. Preoperative hypoalbuminemia is a major risk factor for acute kidney injury following off-pump coronary artery bypass surgery. *Intensive Care Med*. 2012; 38(9):1478–86. Epub 2012/05/24. <https://doi.org/10.1007/s00134-012-2599-8> PMID: 22618092.
23. Asher V, Lee J, Bali A. Preoperative serum albumin is an independent prognostic predictor of survival in ovarian cancer. *Medical oncology (Northwood, London, England)*. 2012; 29(3):2005–9. Epub 2011/07/08. <https://doi.org/10.1007/s12032-011-0019-5> PMID: 21735143.
24. Lyons O, Whelan B, Bennett K, O'Riordan D, Silke B. Serum albumin as an outcome predictor in hospital emergency medical admissions. *European journal of internal medicine*. 2010; 21(1):17–20. Epub 2010/02/04. <https://doi.org/10.1016/j.ejim.2009.10.010> PMID: 20122607.
25. Jellinge ME, Henriksen DP, Hallas P, Brabrand M. Hypoalbuminemia is a strong predictor of 30-day all-cause mortality in acutely admitted medical patients: a prospective, observational, cohort study. *PLoS one*. 2014; 9(8):e105983. Epub 2014/08/26. <https://doi.org/10.1371/journal.pone.0105983> PMID: 25148079.
26. Thongprayoon C, Cheungpasitporn W, Mao MA, Sakhuja A, Erickson SB. Admission hyperphosphatemia increases the risk of acute kidney injury in hospitalized patients. *J Nephrol*. 2018; 31(2):241–7. Epub 2017/10/05. <https://doi.org/10.1007/s40620-017-0442-6> PMID: 28975589.
27. Levey AS, Stevens LA, Schmid CH, Zhang YL, Castro AF 3rd, Feldman HI, et al. A new equation to estimate glomerular filtration rate. *Ann Intern Med*. 2009; 150(9):604–12. PMID: 19414839.
28. Charlson M, Szatrowski TP, Peterson J, Gold J. Validation of a combined comorbidity index. *J Clin Epidemiol*. 1994; 47(11):1245–51. Epub 1994/11/01. PMID: 7722560.
29. Group. KDIGO Clinical Practice Guidelines for Acute Kidney Injury. *Kidney international*. 2012; suppl 2(1):1–138.
30. Zavada J, Hoste E, Cartin-Ceba R, Calzavacca P, Gajic O, Clermont G, et al. A comparison of three methods to estimate baseline creatinine for RIFLE classification. *Nephrol Dial Transplant*. 2010; 25(12):3911–8. Epub 2010/01/27. <https://doi.org/10.1093/ndt/gfp766> PMID: 20100732.
31. Doweiko JP, Nompleggi DJ. Role of albumin in human physiology and pathophysiology. *JPEN Journal of parenteral and enteral nutrition*. 1991; 15(2):207–11. Epub 1991/03/01. <https://doi.org/10.1177/0148607191015002207> PMID: 2051560.
32. Don BR, Kaysen G. Serum albumin: relationship to inflammation and nutrition. *Seminars in dialysis*. 2004; 17(6):432–7. Epub 2005/01/22. <https://doi.org/10.1111/j.0894-0959.2004.17603.x> PMID: 15660573.
33. Marrero JA, Kudo M, Bronowicki JP. The challenge of prognosis and staging for hepatocellular carcinoma. *The oncologist*. 2010; 15 Suppl 4:23–33. Epub 2010/12/09. <https://doi.org/10.1634/theoncologist.2010-S4-23> PMID: 21115578.
34. Gupta D, Lis CG. Pretreatment serum albumin as a predictor of cancer survival: a systematic review of the epidemiological literature. *Nutrition journal*. 2010; 9:69. Epub 2010/12/24. <https://doi.org/10.1186/1475-2891-9-69> PMID: 21176210.
35. Berbel MN, Pinto MP, Ponce D, Balbi AL. Nutritional aspects in acute kidney injury. *Revista da Associação Médica Brasileira (1992)*. 2011; 57(5):600–6. Epub 2011/10/21. PMID: 22012298.
36. Pulimood TB, Park GR. Debate: Albumin administration should be avoided in the critically ill. *Critical care (London, England)*. 2000; 4(3):151–5. Epub 2001/02/24. <https://doi.org/10.1186/cc688> PMID: 11211856.
37. Wilkes MM, Navickis RJ. Patient survival after human albumin administration. A meta-analysis of randomized, controlled trials. *Ann Intern Med*. 2001; 135(3):149–64. Epub 2001/08/07. PMID: 11487482.
38. Nie S, Tang L, Zhang W, Feng Z, Chen X. Are There Modifiable Risk Factors to Improve AKI? *BioMed research international*. 2017; 2017:5605634. Epub 2017/07/27. <https://doi.org/10.1155/2017/5605634> PMID: 28744467.
39. Margaron MP, Soni N. Serum albumin: touchstone or totem? *Anaesthesia*. 1998; 53(8):789–803. Epub 1998/11/03. PMID: 9797524.

40. Contreras AM, Ramirez M, Cueva L, Alvarez S, de Loza R, Gamba G. Low serum albumin and the increased risk of amikacin nephrotoxicity. *Revista de investigacion clinica; organo del Hospital de Enfermedades de la Nutricion*. 1994; 46(1):37–43. Epub 1994/01/01. PMID: [8079062](#).
41. Pockaj BA, Yang JC, Lotze MT, Lange JR, Spencer WF, Steinberg SM, et al. A prospective randomized trial evaluating colloid versus crystalloid resuscitation in the treatment of the vascular leak syndrome associated with interleukin-2 therapy. *Journal of immunotherapy with emphasis on tumor immunology: official journal of the Society for Biological Therapy*. 1994; 15(1):22–8. Epub 1994/01/01. PMID: [8110727](#).
42. Iglesias J, Abernethy VE, Wang Z, Lieberthal W, Koh JS, Levine JS. Albumin is a major serum survival factor for renal tubular cells and macrophages through scavenging of ROS. *The American journal of physiology*. 1999; 277(5 Pt 2):F711–22. Epub 1999/11/24. PMID: [10564234](#).
43. Bureson RL, Jones DB, Yenikomshian AM, Cornwall C, DeVoe C, DeRito J. Clinical renal preservation by cryoperfusion with an albumin perfusate: renal perfusion with albumin. *Archives of surgery (Chicago, Ill. 1960)*. 1978; 113(6):688–92. Epub 1978/06/01. PMID: [350192](#).
44. Gerkens JF. Reproducible vasodilatation by platelet-activating factor in blood- and Krebs-perfused rat kidneys is albumin-dependent. *European journal of pharmacology*. 1990; 177(3):119–26. Epub 1990/02/27. PMID: [2311673](#).
45. Zmlauski-Tucker M, Cohen JJ. Effect of substrate-free albumin on perfused rat kidney function. *Renal physiology*. 1988; 10(6):352–60. Epub 1988/01/01. PMID: [3231893](#).
46. Wegman DH, Apelqvist J, Bottai M, Ekstrom U, Garcia-Trabanino R, Glaser J, et al. Intervention to diminish dehydration and kidney damage among sugarcane workers. *Scandinavian journal of work, environment & health*. 2017. Epub 2017/07/12. <https://doi.org/10.5271/sjweh.3659> PMID: [28691728](#).
47. Tanriverdi O. A discussion of serum albumin level in advanced-stage hepatocellular carcinoma: a medical oncologist's perspective. *Medical oncology (Northwood, London, England)*. 2014; 31(11):282. Epub 2014/10/16. <https://doi.org/10.1007/s12032-014-0282-3> PMID: [25316265](#).
48. Mutlu EA, Keshavarzian A, Mutlu GM. Hyperalbuminemia and elevated transaminases associated with high-protein diet. *Scandinavian journal of gastroenterology*. 2006; 41(6):759–60. Epub 2006/05/24. <https://doi.org/10.1080/00365520500442625> PMID: [16716979](#).
49. Kaysen GA, Jones H Jr., Hutchison FN. High protein diets stimulate albumin synthesis at the site of albumin mRNA transcription. *Kidney international Supplement*. 1989; 27:S168–72. Epub 1989/11/01. PMID: [2561516](#).
50. Lee EH, Kim WJ, Kim JY, Chin JH, Choi DK, Sim JY, et al. Effect of Exogenous Albumin on the Incidence of Postoperative Acute Kidney Injury in Patients Undergoing Off-pump Coronary Artery Bypass Surgery with a Preoperative Albumin Level of Less Than 4.0 g/dl. *Anesthesiology*. 2016; 124(5):1001–11. Epub 2016/02/19. <https://doi.org/10.1097/ALN.0000000000001051> PMID: [26891150](#).
51. Delaney AP, Dan A, McCaffrey J, Finfer S. The role of albumin as a resuscitation fluid for patients with sepsis: a systematic review and meta-analysis. *Critical care medicine*. 2011; 39(2):386–91. Epub 2011/01/21. <https://doi.org/10.1097/CCM.0b013e3181ffe217> PMID: [21248514](#).
52. Wiedermann CJ, Dunzendorfer S, Gaioni LU, Zaraca F, Joannidis M. Hyperoncotic colloids and acute kidney injury: a meta-analysis of randomized trials. *Critical care (London, England)*. 2010; 14(5):R191. Epub 2010/10/30. <https://doi.org/10.1186/cc9308> PMID: [21029460](#).
